# Supplementary material for: Drug Target Validation of the Protein Kinase AEK1, Essential for Proliferation, Host Cell Invasion, and Intracellular Replication of the Human Pathogen Trypanosoma cruzi
Source: PubMed Central journal article supplement (PMC8557885; doi:10.1128/spectrum.00738-21), 2021-09-29
Supplement: spectrum00738-21_supp_1_seq11.pdf [file spectrum00738-21_supp_1_seq11.pdf]

## Supplementary Information

### **Drug Target Validation of the Protein Kinase *AEK1*, Essential for Proliferation, Host Cell Invasion, and Intracellular Replication of the Human Pathogen *Trypanosoma cruzi***

Miguel A. Chiurillo<sup>1,2,\*</sup>, Bryan C. Jensen<sup>3</sup>, and Roberto Docampo<sup>1,\*</sup>

<sup>1</sup>Center for Tropical and Emerging Global Diseases, and Department of Cell Biology,  
University of Georgia, Athens, GA, 30602, USA

<sup>2</sup>Department of Biological Sciences, University of Cincinnati, Cincinnati, OH 45221

<sup>3</sup>Seattle Children's Research Institute, Seattle, WA 98109



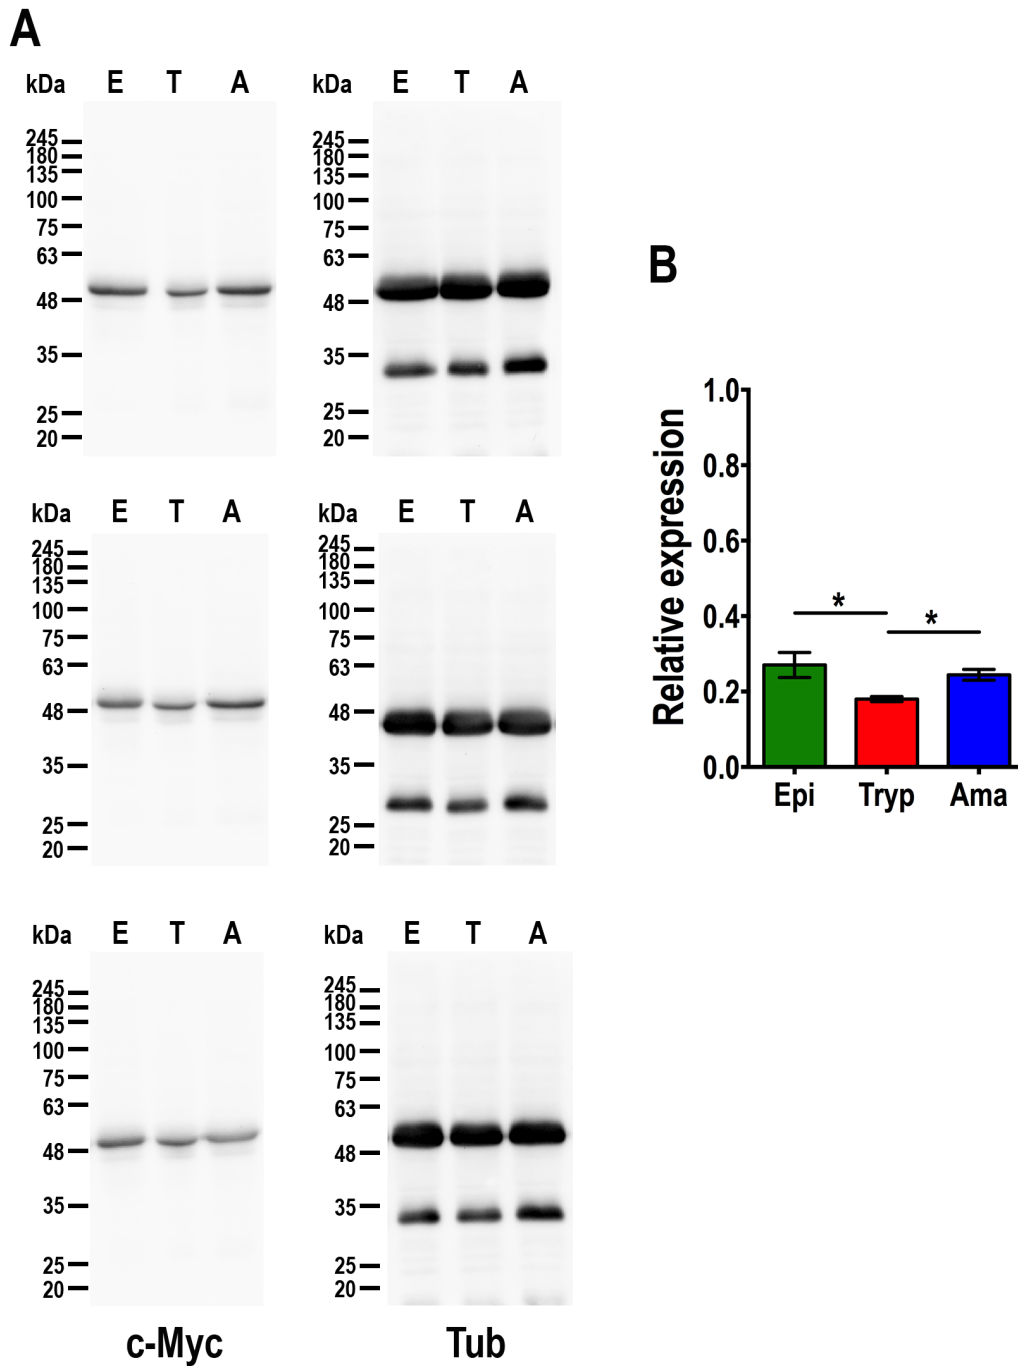

**FIG S2** Expression of endogenously tagged *TcAEK1-3xc-Myc* in the three life cycle stages of *T. cruzi*. (A) Complete western blots (3 experiments) of *TcAEK1-3xc-Myc* in total extracts of epimastigotes (E), tissue culture cell-derived trypomastigotes (T), and amastigotes (A) using anti-c-Myc antibodies. Tubulin was used as loading control. (B) Densitometry analysis of three western blots. Values are means  $\pm$  S.D. (n = 3). \* $P < 0.05$  (one-way ANOVA with Tukey's multiple comparisons test).

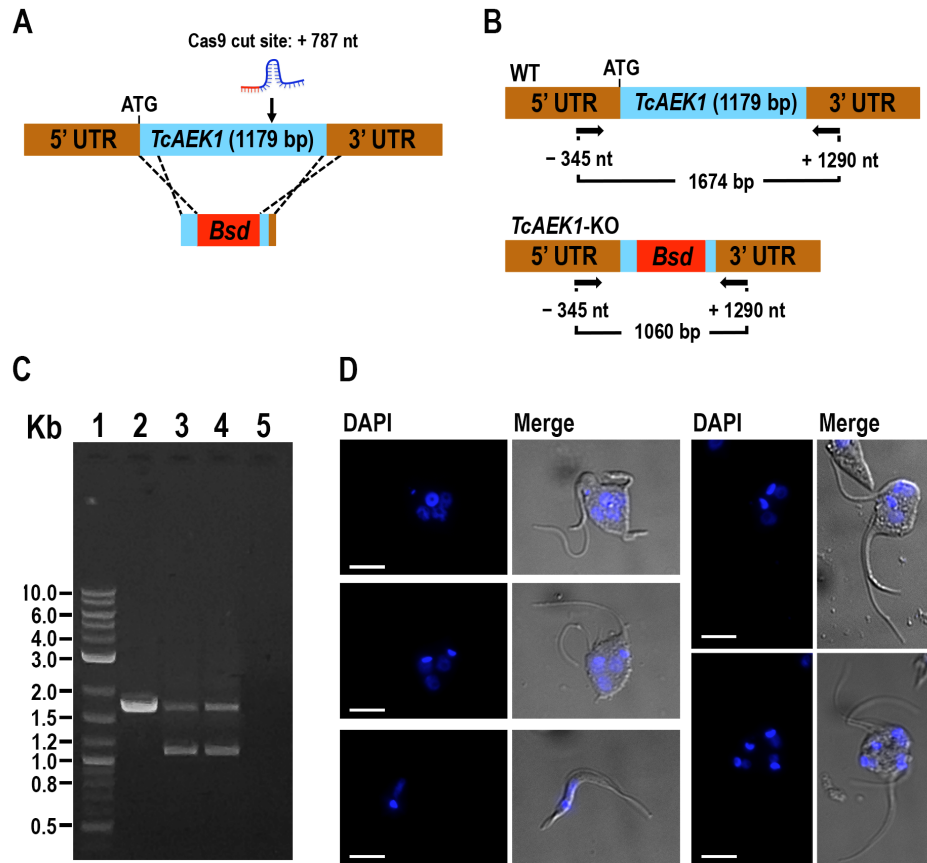

**FIG S3** Generation of *TcAEK1*-SKO cells by a second strategy. (A) Schematic representation of the second strategy (using a different DNA donor) designed to generate a *TcAEK1*-KO mutant by CRISPR/Cas9-induced homologous recombination. Epimastigotes constitutively expressing Cas9 and sgRNA that can originate a DNA double-stranded break at nt +787 of the *TcAEK1* ORF (1,179 bp) were transfected with a blasticidin *S*-deaminase (*Bsd*) cassette containing ~100-bp homologous regions spanning from nt +1 to +96 and from nt +1094 to +1190 of the *TcAEK1* locus to induce homologous -directed repair. (B) PCR primers used to verify *TcAEK1* ablation. Arrows indicate primers added to the reaction. The intact locus generates a PCR product of 1,674 bp, while the disrupted locus generates a DNA fragment of 1,060 bp. UTR, untranslated region. (C) Only one *TcAEK1* allele was disrupted at its genomic locus in the SKO cell lines. Lanes: 1, 1-kb plus ladder; 2, WT; 3, *TcAEK1*-SKO-2 population #1; 4, *TcAEK1*-SKO-2 population #2; 5, PCR negative control. (D) Representative images displaying aberrant cell morphology and DNA content of *TcAEK1*-SKO-2 epimastigotes, as well as trypomastigote cell originated in exponential culture in LIT medium (lower left panel). DAPI staining (blue) and merge with DIC images are shown. Scale bars = 5  $\mu$ m.

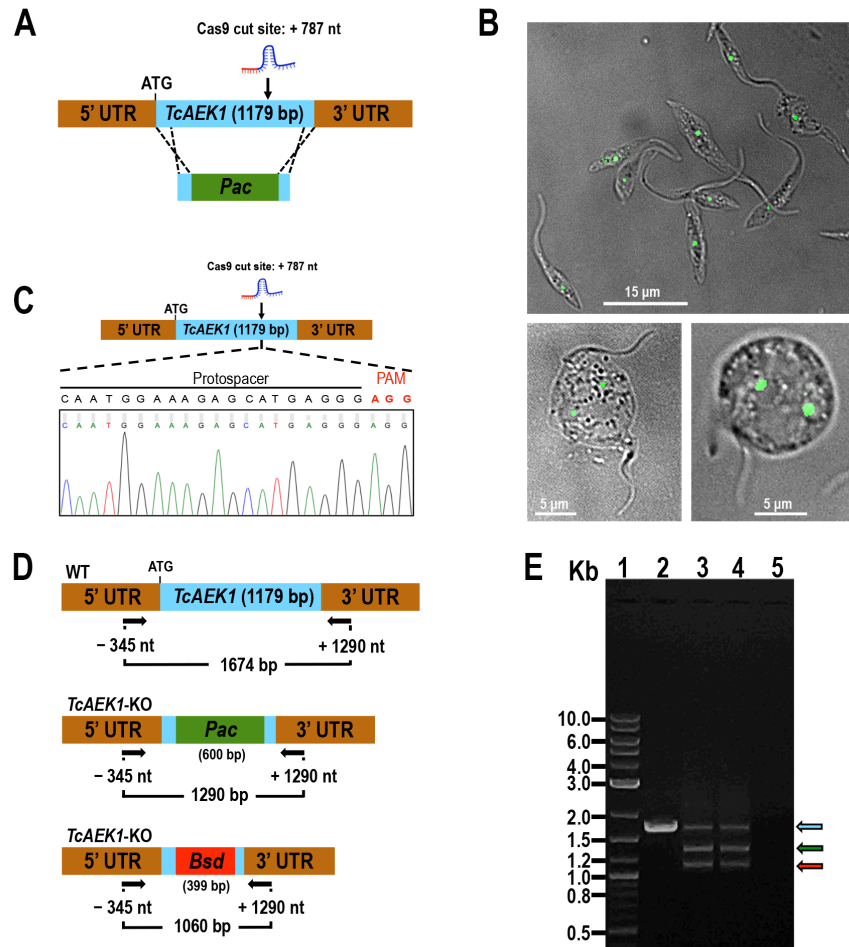

**FIG S4** Generation of *TcAEK1*-SKO cells by a third strategy. A third strategy was designed to try to generate a *TcAEK1* KO cell line, *TcAEK1*-SKO-2 epimastigotes were transfected with a puromycin N-acetyltransferase cassette (*Pac*). (A) Schematic representation of the third strategy designed to generate a *TcAEK1*-KO mutant by CRISPR/Cas9-induced homologous recombination. *TcAEK1*-SKO-2 epimastigotes constitutively expressing Cas9 and sgRNA that originate a DNA double-stranded break at nt +787 of the *TcAEK1* ORF were transfected with a *Pac* cassette containing ~100-bp homologous regions spanning from nt +1 to +96 and from nt +1094 to +1190 of the *TcAEK1* locus to induce homologous directed repair. (B) Constitutive nuclear expression of fluorescent Cas9-GFP was confirmed in *TcAEK1*-SKO-2 epimastigotes and multinucleated cells by fluorescence microscopy. Panels show merged images of DIC and green (GFP) fluorescence. (C) Integrity of the protospacer nucleotide sequence for sgRNA-787 in *TcAEK1*-SKO-2 cells was confirmed by checking the DNA sequence of the amplified *TcAEK1* WT allele. (D) PCR primers used to verify *TcAEK1* ablation. Arrows indicate primers added to the reaction. The intact locus generates a PCR product of 1,674 bp, while the loci disrupted with *Pac* and *Bsd* cassettes generate DNA fragments of 1,290 bp and 1,060 bp, respectively. UTR, untranslated region. (E) Two disrupted *TcAEK1* alleles at their genomic loci and one WT was detected by PCR in the SKO-3 cell lines (blasticidin/puromycin resistant). Lanes: 1, 1-kb plus ladder; 2, WT; 3, *TcAEK1*-SKO-3 population #1; 4, *TcAEK1*-SKO-3 population #2; 5, PCR negative control. Color of arrows (right) indicates the three amplified fragments corresponding to WT *TcAEK1* (light blue), and *Pac* (green) and *Bsd* (red) containing DNA fragments as shown in (D).

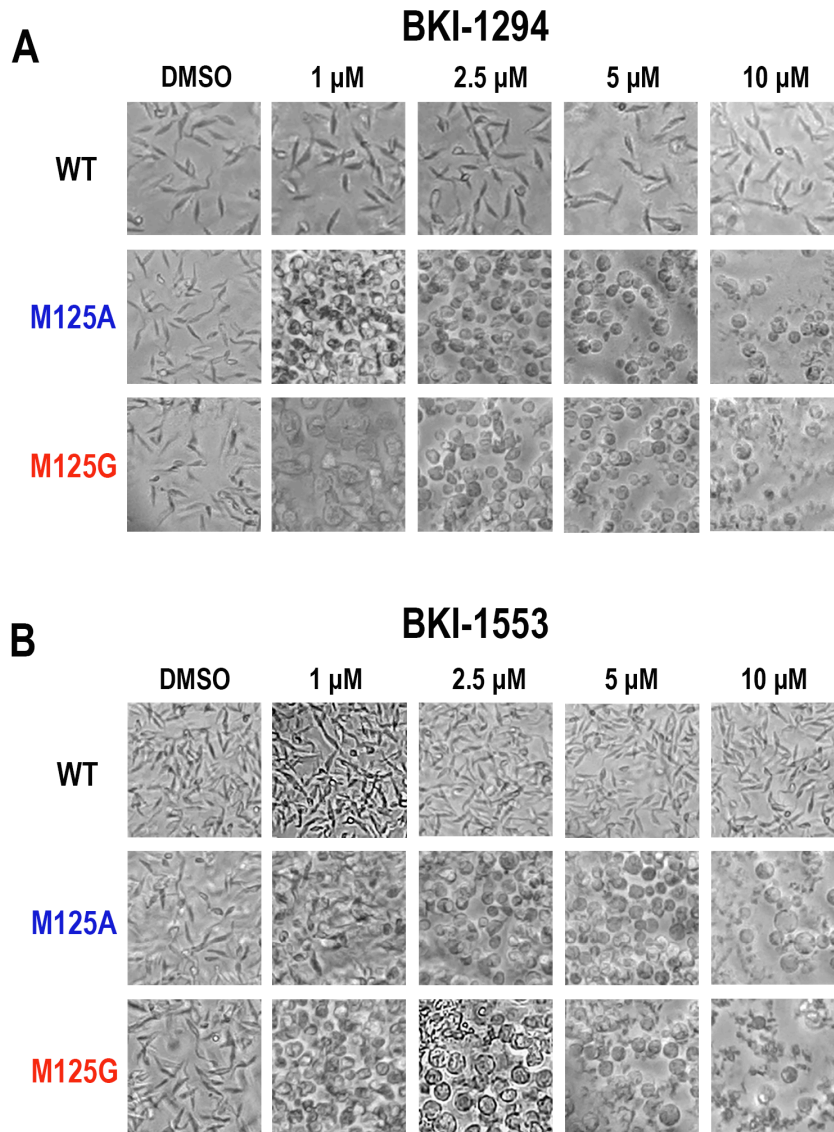

**FIG S5** BKIs and effects on *TcAEK1* gatekeeper mutants. Representative phase images of *TcAEK1*<sup>WT</sup> (WT), *TcAEK1*<sup>M125A</sup> (M125A) and *TcAEK1*<sup>M125G</sup> (M125G) epimastigotes treated with DMSO (0.2%) or 1, 2.5, 5, 10  $\mu$ M of BKI 1294 (A) or 1553 (B).  $2.5 \times 10^6$  cells (1 ml) in LIT medium supplemented with 10% FBS were incubated for 48h at 27°C.

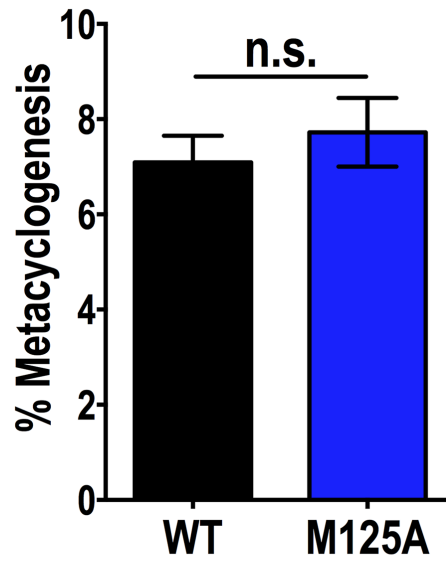

**FIG S6** Percentage of metacyclic trypomastigotes in epimastigote culture after incubation in TAU 3AAG medium. *TcAEKI*<sup>WT</sup> (WT) and *TcAEKI*<sup>M125A</sup> (M125A) epimastigotes differentiation to metacyclic trypomastigotes was quantified by staining with DAPI to distinguish the position of the kinetoplast by fluorescence microscopy. No significant (n.s.) difference was found using Student's *t* test ( $n = 3$ ).

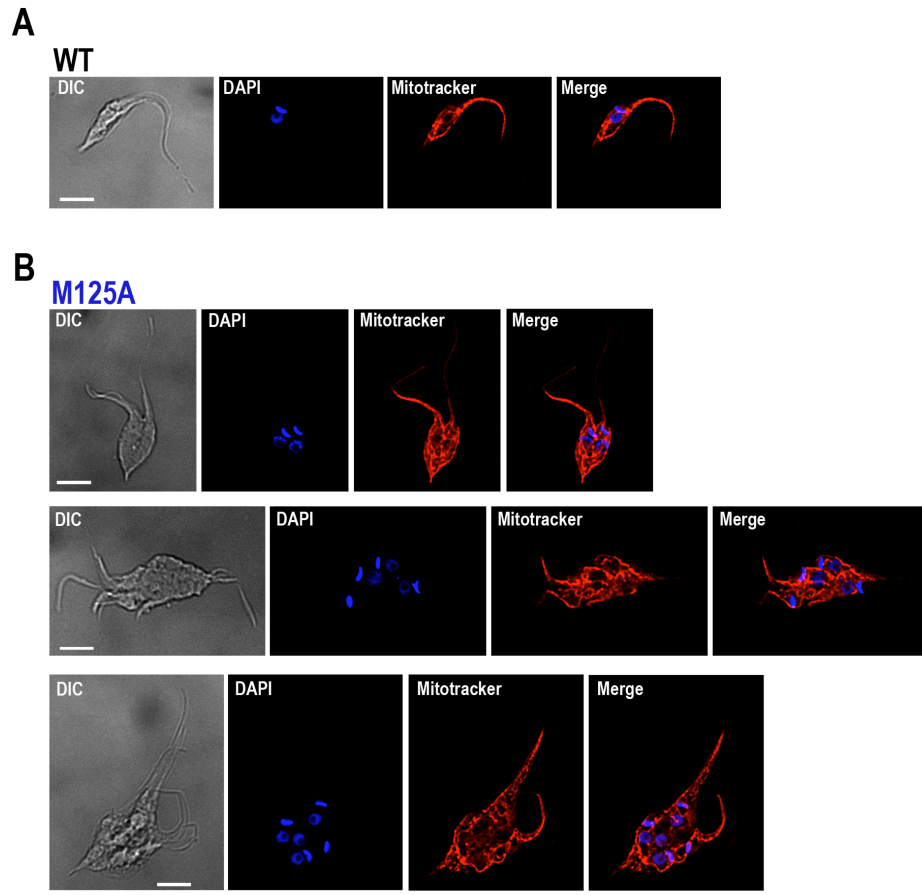

**FIG S7** Effect of BKI 1553 on mitochondrial integrity of *TcAEK1* gatekeeper mutants. *T. cruzi* epimastigotes were treated with 1.5  $\mu$ M of compound 1553 for 48 h. Epimastigotes were then incubated with 100 nM MitoTracker deep red FM for 30 min at 28°C in culture medium before the fixing procedure and visualization by fluorescence microscopy. (A) *TcAEK1*<sup>WT</sup> (WT), and (B) *TcAEK1*<sup>M125A</sup> (M125A).



Table S1. Oligonucleotides used in this work.

| N° | Primer name             | Sequence (5' → 3')                                                                                                                                            |
|----|-------------------------|---------------------------------------------------------------------------------------------------------------------------------------------------------------|
| 1  | FwAEK1-XbaI             | AGTCTCTAGAATGATGATGATGCCTAATGAATATG                                                                                                                           |
| 2  | RvAEK1-XhoI             | ACTGCTCGAGCTAATTTTTATTCAAGTGGTTATCCG                                                                                                                          |
| 3  | FwAEK1_sgRNA-Ctag_BamHI | GATCGGATCC <b>TAACCACTTGAATAAAAAAT</b> GTTTTAGAGCTAGAAATAGC                                                                                                   |
| 4  | RvSgRNA                 | CAGTGGATCCAAAAAAGCACCGACTCGGTG                                                                                                                                |
| 5  | FwAEK1-Ctag-ultra       | <u>ACTTGTCAATACGCCTGCGCAGTCGTCACAAC<b>TGAACTCGCGGCAGCAGCAGC</b>TTTTCACGGGGTTTT</u><br><u>CATGCACAGCGGATAACC<b>ACTTGAATAAAAAAT</b></u> GGTACCGGGCCCCCCCCCTCGAG |
| 6  | FwAEK1_CMut-Ctag-ultra  | <u>ACTTGTCAATACGCCTGCGCAGTCGTCACAAC<b>TGAACTCGCGGCAGCAGCAGC</b>TTTTCACGGGGTTTT</u><br><u>CATGCACAGCGGATAAC<b>ggCTTGAATggAAAT</b></u> GGTACCGGGCCCCCCCCCTCGAG  |
| 7  | RvAEK1-Ctag-ultra       | <u>TCGCGCCTTCGCCGTCCCCGTGTGTCTC<b>ATTTTACTCCCTCGCTGGGGAATAAAGAAAAATCAA</b></u><br><u>AACAAAACAAAACAAACA<b>AGAAAAAAAAG</b></u> ATGGCGCCGCTCTAGAACTAGTGGAT      |
| 8  | FwAEK1-Ctag-Check       | TGCCAATCCCATCGCCAG                                                                                                                                            |
| 9  | RvAEK1-KO/Ctag-Check    | TTTCTACCCTCGTCGTTCCC                                                                                                                                          |
| 10 | FwAEK1_sgRNA-787_BamHI  | GATCGGATCC <b>CAATGGAAAGAGCATGAGGG</b> GTTTTAGAGCTAGAAATAGC                                                                                                   |
| 11 | FwAEK1-KO-ultra-Bsd     | <u>GCACACAAAGACACAAACGTACCCTCAGATAGAAAGCCCGCGGAATAAAAGGCCTTTGGTGT<b>TTGTGT</b></u><br><u>GTGTGTAGTTTTTCTT<b>GATTTTGTGTGTTG</b></u> ATGGCCAAGCCTTTGTCTCAAG     |
| 12 | FwAEK1-KO-ultra-Bsd2    | <u>TTGTTTTTGAAGCTTTTTCAAAGGGACAAGAAGGAGAAGGACGAAGAGCGTTCCGGCGAAAAGCCAG</u><br><u>CGAGAAGAAGGTTGGTAACAATAACC<b>ATTTGG</b></u> ATGGCCAAGCCTTTGTCTCAAG           |
| 13 | FwAEK1-KO-ultra-Pac     | <u>TTGTTTTTGAAGCTTTTTCAAAGGGACAAGAAGGAGAAGGACGAAGAGCGTTCCGGCGAAAAGCCAG</u>                                                                                    |

|                           |                                                                                                                                                                       |
|---------------------------|-----------------------------------------------------------------------------------------------------------------------------------------------------------------------|
|                           | <u>CGAGAAGAAGGTTGGTAACAATAACCATTTGG</u> ATGACCGAGTACAAGCCCAC                                                                                                          |
| 14 RvAEK1-KO-Ultra-Bsd    | <u>AAAAAAAAAGACCTAATTTTTATTCAAGTGGTTATCCGCTGTGCATGAAAACCCCGTGAAAAGCTGCTGCTGCCCGGAGTTCAGTTGTGACGACTGC</u> TCATTAGCCCTCCCACACATAACC                                     |
| 15 RvAEK1-KO-Ultra-Pac    | <u>AAGACCTAATTTTTATTCAAGTGGTTATCCGCTGTGCATGAAAACCCCGTGAAAAGCTGCTGCTGCCGCGAGTTCAGTTGTGACGACTGC</u> TCATCAGGCACCGGGCTTGCGGG                                             |
| 16 FwAEK1-KO check        | ATGGAGGACATGAACATTGCGG                                                                                                                                                |
| 17 FwAEK1-sgRNA-386_BamHI | GATCGGATCCGTGATGGAATATATGCCAGGGTTTTAGAGCTAGAAATAGC                                                                                                                    |
| 18 FwAEK1_gatekeeper_WT   | <u>AATGTATTGTCACGTATCAATCACCCATATCTTTTGAAGCTTTACTGGACCTTTCAGTCGGAGCATAA</u><br><u>GTTGTTTTTGTGATGGA</u> <i>gTAc</i> ATGCC <i>tGGAGGCGATTTAGACAAATATATGAAC</i>         |
| 19 FwAEK1_gatekeeper_Ala  | <u>AATGTATTGTCACGTATCAATCACCCATATCTTTTGAAGCTTTACTGGACCTTTCAGTCGGAGCATAA</u><br><u>GTTGTTTTTGT</u> <i>agcGGA</i> <i>gTAc</i> ATGCC <i>tGGAGGCGATTTAGACAAATATATGAAC</i> |
| 20 FwAEK1_gatekeeper_Gly  | <u>AATGTATTGTCACGTATCAATCACCCATATCTTTTGAAGCTTTACTGGACCTTTCAGTCGGAGCATAA</u><br><u>GTTGTTTTTGT</u> <i>aggGGA</i> <i>gTAc</i> ATGCC <i>tGGAGGCGATTTAGACAAATATATGAAC</i> |
| 21 RvpMOTag/AEK1          | CTCGAGGGGGGGCCCGGTACCCGGATTTTTATTCAAGTGGTTATC                                                                                                                         |
| 22 FwAEK1/pMOTag          | GATAACCACTTGAATAAAAAATCCGGGTACCGGGCCCCCCTCGAG                                                                                                                         |
| 23 FwAEK1_+143            | TGAGAGTCTGGATGTACTTGG                                                                                                                                                 |
| 24 RvAEK1_+572            | TCAGCCAAAACACAATGTCC                                                                                                                                                  |

Bold uppercase: specific protospacer; italic uppercase: restriction site; bold underlined uppercase: gene-specific homologous region in ultramers used for knockout strategies; italic lower case: mismatch nucleotides
